# Supplementary material for: Gold leaf electrochemical sensors: applications and nanostructure modification
Source: Royal Society of Chemistry journal article supplement (doi:10.1039/d0an02455d), 2021-01-01
Supplement: d0an02455d5.pdf [file d0an02455d5.pdf]

## Appendix E

### Supplementary results with Figure S5 - Figure S12 and Table S1

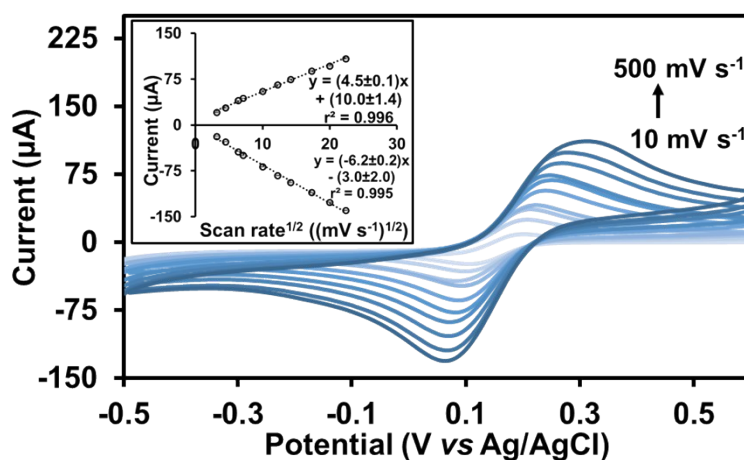

**Fig. S5.** Cyclic voltammograms of 6 mmol L<sup>-1</sup> K<sub>3</sub>Fe(CN)<sub>6</sub> in 0.1 mol L<sup>-1</sup> KCl obtained from the “planar-disc gold leaf sensor” at various scan rates (10, 20, 40, 50, 100, 150, 200, 300, 400 and 500 mV s<sup>-1</sup>). The plots of the anodic current and cathodic current against the square root of the scan rate are shown as inset.

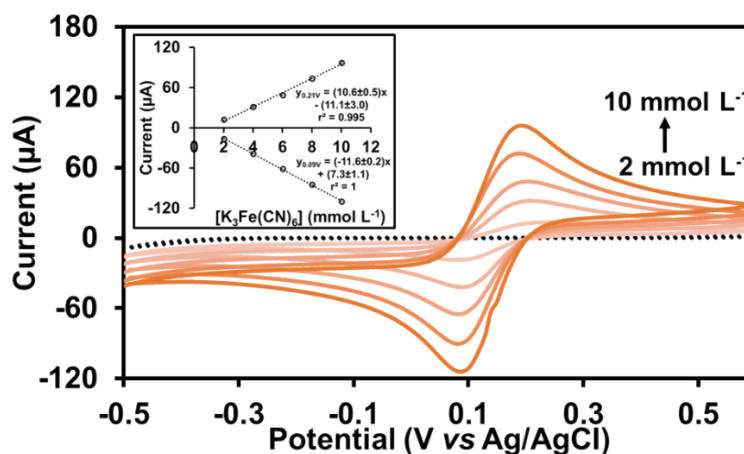

**Fig. S6.** Performance of the “planar-disc gold leaf sensor” in analyzing samples as droplet (100 μL) showing the cyclic voltammograms of 2-10 mmol L<sup>-1</sup> K<sub>3</sub>Fe(CN)<sub>6</sub> in 0.1 mol L<sup>-1</sup> KCl solution. The calibration lines from the oxidation and the reduction peak potentials are shown as inset.

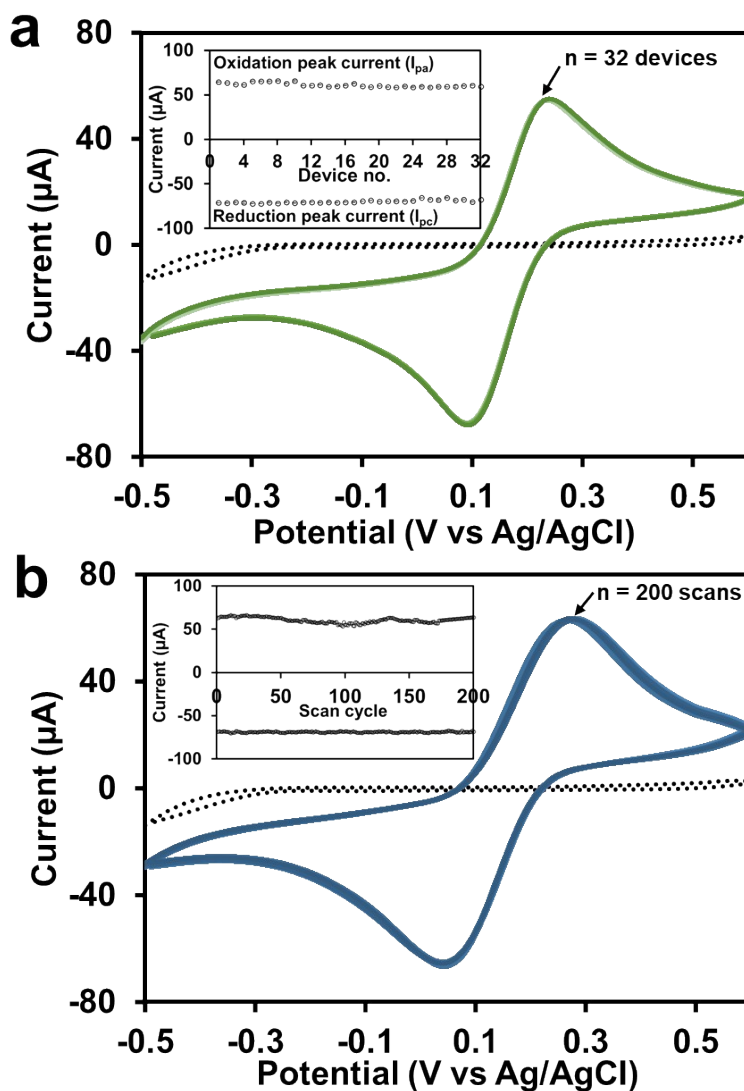

**Fig. S7.** Cyclic voltammograms of 6 mmol L<sup>-1</sup> K<sub>3</sub>Fe(CN)<sub>6</sub> in 0.1 mol L<sup>-1</sup> KCl (dark lines) obtained from the planar-disc gold leaf sensors in the tests of (a) fabrication reproducibility: 96 CV scans of 32 different sensors (triplicate scans per sensor) and of (b) reusability of the sensor: 200 scan-cycles of a single sensor. Each inset presents the values of I<sub>pa</sub> and I<sub>pc</sub> obtained from each set of the CV scans. Dotted lines are the background signals for 0.1 mol L<sup>-1</sup> KCl.

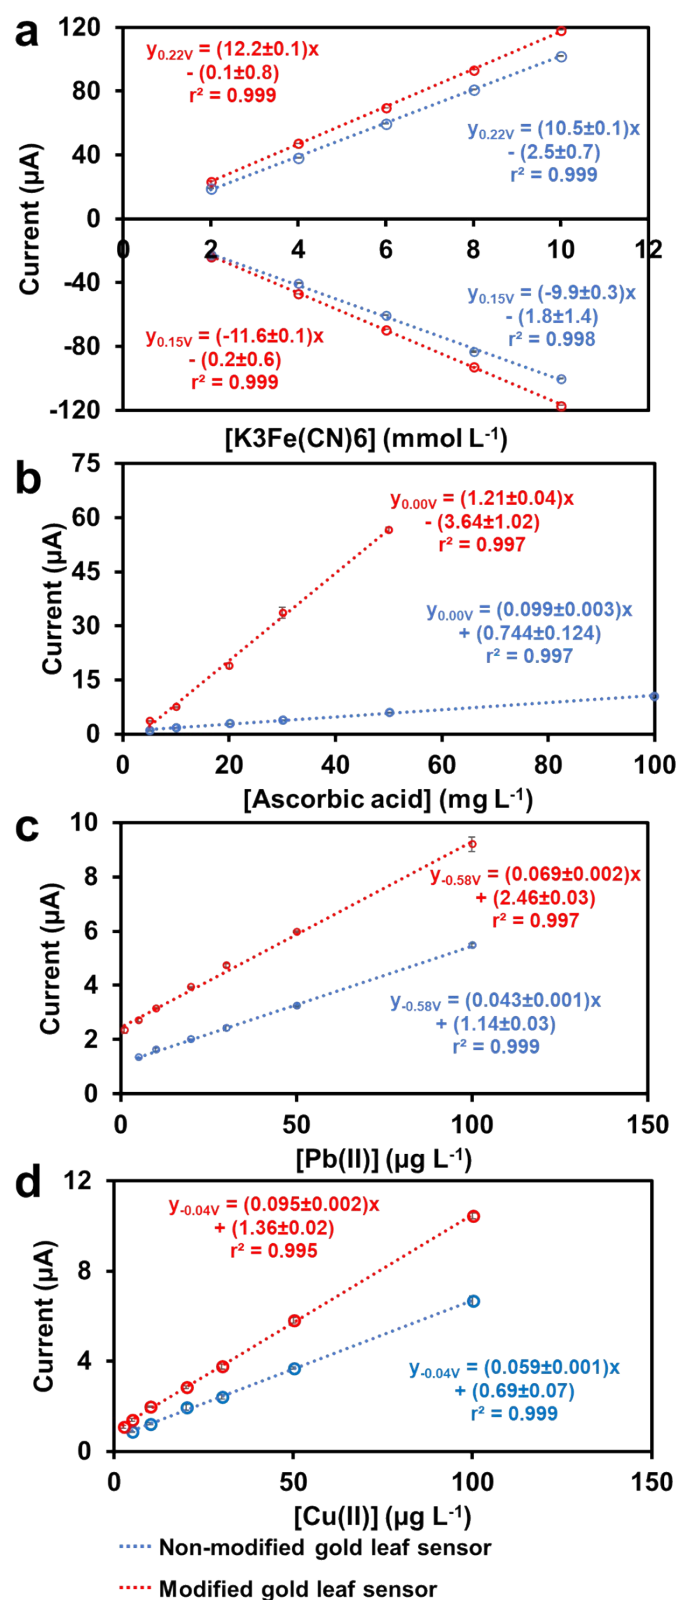

**Fig. S8.** Examples of increase in sensitivities after surface modification of planar-disc gold leaf surface: (a) quantitation of ferricyanide by cyclic voltammetry, (b) determination of ascorbic acid by square wave voltammetry and analysis of (c) Pb(II) and (d) Cu(II) by square wave anodic stripping voltammetry.



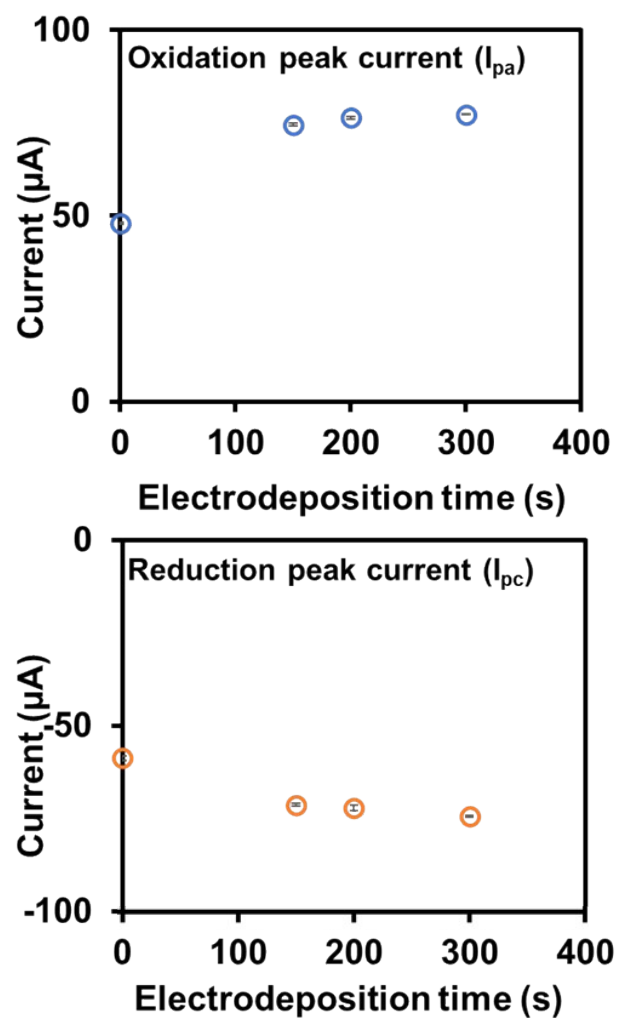

**Fig. S9.** Effect of electrodeposition time on the property of the “planar-disc gold leaf sensor”. The currents are from repetitive scans of cyclic voltammograms using the test ferricyanide solution ( $6 \text{ mmol L}^{-1} \text{ K}_3\text{Fe(CN)}_6$  in  $0.1 \text{ mol L}^{-1} \text{ KCl}$ ).

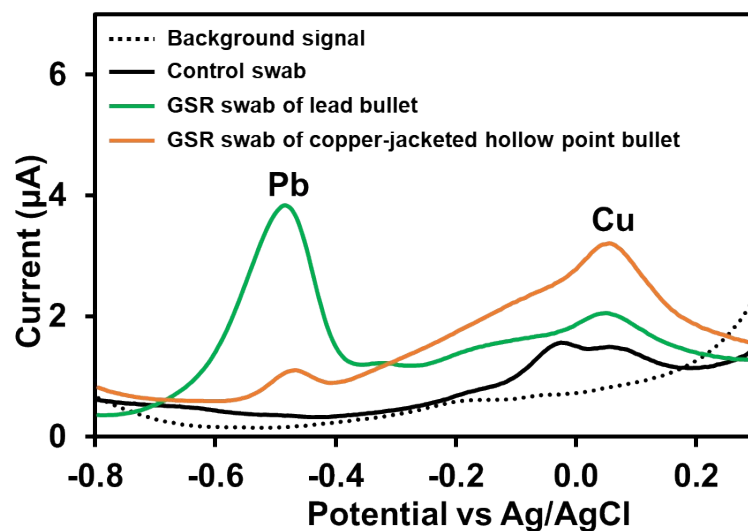

**Fig. S10.** Voltammograms from SWASV of the extracts from swabs of GSR at bullet holes and periphery of the holes after firing a single lead or copper-jacketed hollow point bullet. The control is the extract of the swab taken from zinc metal sheet target before firing. The background is the voltammogram of the supporting electrolyte.

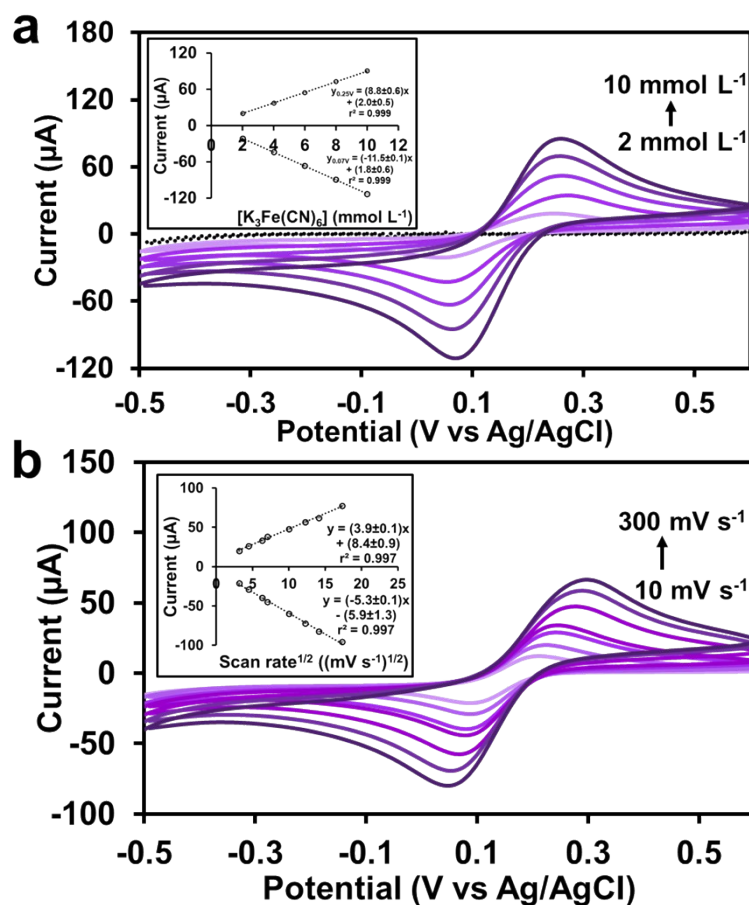

**Fig. S11.** Characterization of the planar gold leaf with hand-drawn carbon and silver-silver chloride electrodes by (a) CV scans in 2-10 mmol L<sup>-1</sup> of K<sub>3</sub>Fe(CN)<sub>6</sub> solutions in 0.1 mol L<sup>-1</sup> KCl with the calibration graphs in the inset and (b) the effect of scan rate investigated using 6 mmol L<sup>-1</sup> of K<sub>3</sub>Fe(CN)<sub>6</sub> solution in 0.1 mol L<sup>-1</sup> KCl.

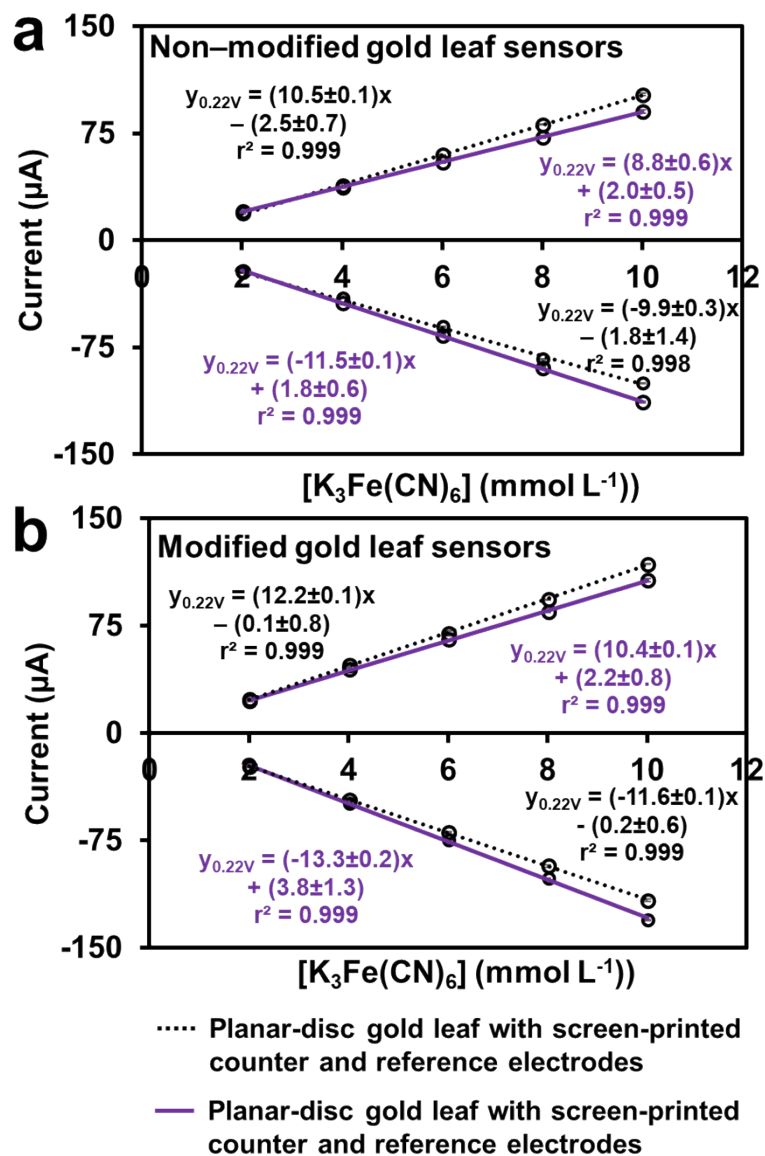

**Fig. S12.** Plots of the anodic or cathodic peak current against concentration of ferricyanide obtained from the characterizations of the hand-drawn sensor and the screen-printed sensor before and after the gold electrodeposition process on gold leaf surfaces.



**Table S1.** Determination of Pb(II) in bottled drinking water and bottled mineral water and recovery of spiked samples using the “planar-disc gold leaf sensor”

| Sample                    | Pb(II) contents ( $\mu\text{g L}^{-1}$ ) (n=3) |       |                | %Recovery   |
|---------------------------|------------------------------------------------|-------|----------------|-------------|
|                           | Measured                                       | Added | Found          |             |
| Bottled drinking water #1 | n.d.                                           | 20.0  | $20.5 \pm 0.6$ | $102 \pm 3$ |
| Bottled drinking water #2 | n.d.                                           | 20.0  | $20.7 \pm 0.2$ | $103 \pm 1$ |
| Bottled mineral water #1  | n.d.                                           | 20.0  | $20.7 \pm 0.8$ | $104 \pm 4$ |
| Bottled mineral water #2  | n.d.                                           | 20.0  | $20.2 \pm 0.8$ | $101 \pm 4$ |

n.d. = not detectable, LOD =  $3.2 \mu\text{g L}^{-1}$
